# Supplementary material
Source: PubMed Central journal article supplement (PMC3191043)
Supplement: supp_M111.261206_jbc.M111.261206-2.pdf [file supp_M111.261206_jbc.M111.261206-2.pdf]

## Supplementary Data

**Suppl. Fig. 1. Ganglioside levels in 4 month-old mice.** One of three representative thin layer chromatography plates is shown; in 2 of the 3 analyses there was no change in GM1 levels, but a small decrease in GM1 levels is observed in the thin layer chromatography plate shown in the figure. The *right-hand* lane shows pure ganglioside standards.

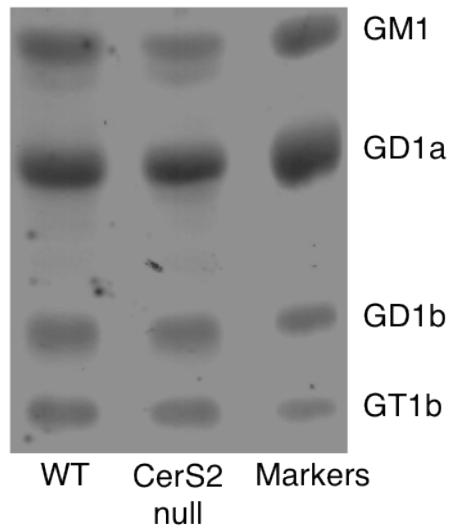

**Suppl. Movie 1. EEG recording of the CerS2 null mice during an audible induced stimulus, inflicted by key jerking.**

Recording of a CerS2 null mouse during an audible-induced stimulus response inflicted by shaking a key bundle above the transgenic mouse for 5 secs, which induced a myoclonic jerk in the CerS2 null mouse. EEG recording during the induced response is shown. No change in cortical EEG was observed indicating a sub-cortical origin of the motor dysfunction.

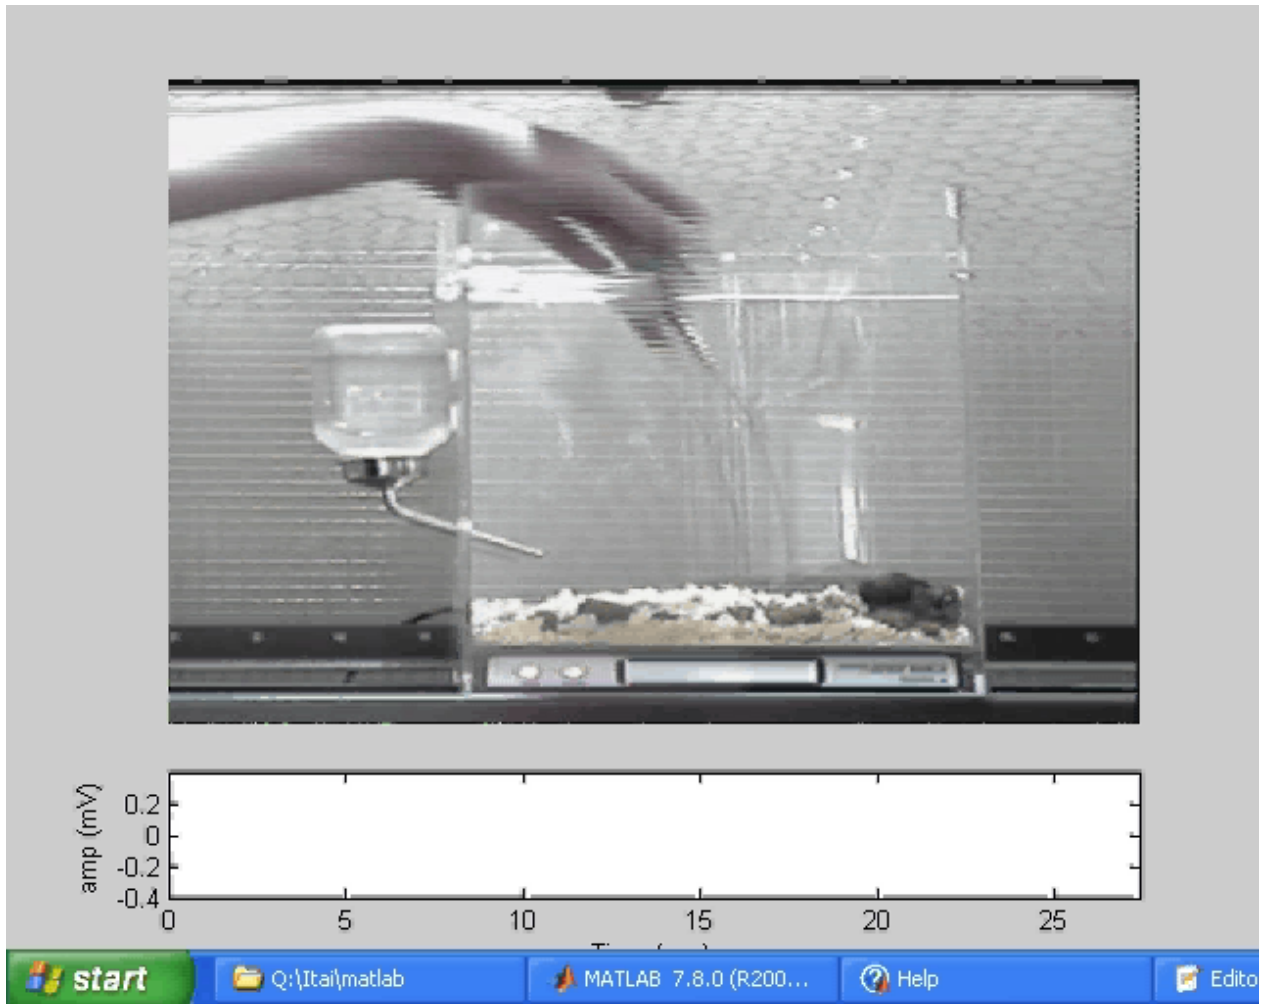

**Supplementary Table 1. HexCer composition of WT and CerS2 null mouse brains.** For details, see Fig. 1.

| HexCer acyl chain length ( <i>pmol/mg of tissue</i> ) (WT) |            |             |            |           |              |             |            |
|------------------------------------------------------------|------------|-------------|------------|-----------|--------------|-------------|------------|
| Age ( <i>days</i> )                                        | C16        | C18         | C18:1      | C20       | C22          | C24:1       | C24        |
| 0                                                          | 1.2 ± 0.04 | 8.5 ± 6.6   | 0.2 ± 0.02 | 0.3 ± 0.1 | 1.3 ± 0.6    | 0.4 ± 0.3   | 0.3 ± 0.1  |
| 30                                                         | 1.2 ± 0.5  | 36.9 ± 7.7  | 0.1 ± 0.1  | 3.3 ± 0.8 | 16 ± 1.2     | 122.1 ± 5.2 | 39.8 ± 4.1 |
| 120                                                        | 2.2 ± 0.4  | 51.5 ± 11.2 | 0.4 ± 0.1  | 17 ± 5.5  | 112.6 ± 22.2 | 838 ± 80    | 281 ± 52.1 |

  

| HexCer acyl chain length ( <i>pmol/mg of tissue</i> ) (CerS2 null) |                        |                         |                        |                        |                        |                        |                        |
|--------------------------------------------------------------------|------------------------|-------------------------|------------------------|------------------------|------------------------|------------------------|------------------------|
| Age ( <i>days</i> )                                                | C16                    | C18                     | C18:1                  | C20                    | C22                    | C24:1                  | C24                    |
| 0                                                                  | 1.3 ± 0.5              | 5.5 ± 1.6               | 0.3 ± 0.1              | 0.4 ± 0.2              | 0.7 ± 0.2              | 0.3 ± 0.1              | 0.2 ± 0.005            |
| 30                                                                 | 3.9 ± 0.3 <sup>a</sup> | 214 ± 12.2 <sup>a</sup> | 0.0 ± 0.0 <sup>a</sup> | 2.1 ± 0.2 <sup>a</sup> | 0.8 ± 0.2 <sup>a</sup> | 0.4 ± 0.2 <sup>a</sup> | 0.4 ± 0.1 <sup>a</sup> |
| 120                                                                | 3.2 ± 0.9 <sup>a</sup> | 106 ± 38 <sup>a</sup>   | 0.9 ± 0.5 <sup>a</sup> | 9 ± 0.6 <sup>a</sup>   | 3.9 ± 0.3 <sup>a</sup> | 4.1 ± 1.5 <sup>a</sup> | 4.2 ± 0.6 <sup>a</sup> |

<sup>a</sup> p<0.05 (CerS2 null versus WT)

**Supplementary Table 2. SL composition of purified myelin from WT and CerS2 null mice.** For details, see Fig. 3.

| Lipid    | SL acyl chain length ( <i>pmol/mg of tissue</i> ) (WT) |            |            |             |            |             |            |
|----------|--------------------------------------------------------|------------|------------|-------------|------------|-------------|------------|
|          | C16                                                    | C18        | C18:1      | C20         | C22        | C24:1       | C24        |
| Ceramide | 22.3 ± 5.1                                             | 549 ± 75   | 4.7 ± 1.3  | 14.3 ± 1.8  | 9.6 ± 2.3  | 258 ± 91    | 23.5 ± 5.2 |
| SM       | 46.8 ± 6                                               | 452 ± 20.6 | 120 ± 20   | 34.3 ± 4.1  | 34.4 ± 4.2 | 447 ± 60    | 82.5 ± 6.8 |
| GlcCer   | 0.4 ± 0.3                                              | 2.3 ± 0.4  | 1 ± 0.2    | 0.2 ± 0.04  | 0.5 ± 0.04 | 7.4 ± 1.9   | 1.5 ± 0.5  |
| GalCer   | 6.2 ± 3.5                                              | 79 ± 33    | 1.7 ± 1.2  | 26.6 ± 13.5 | 147 ± 67   | 1963 ± 1158 | 417 ± 200  |
| LacCer   | 1.2 ± 0.3                                              | 16.4 ± 1.6 | 0.3 ± 0.04 | 0.5 ± 0.2   | 0.5 ± 0.1  | 4.2 ± 1.1   | 0.9 ± 0.3  |

| Lipid    | SL acyl chain length ( <i>pmol/mg of tissue</i> ) (CerS2 null) |             |                        |                          |                        |                        |                         |
|----------|----------------------------------------------------------------|-------------|------------------------|--------------------------|------------------------|------------------------|-------------------------|
|          | C16                                                            | C18         | C18:1                  | C20                      | C22                    | C24:1                  | C24                     |
| Ceramide | 34.1 ± 29.8                                                    | 652 ± 515   | 24 ± 17.3 <sup>a</sup> | 17.2 ± 15.3 <sup>a</sup> | 0.4 ± 0.3 <sup>a</sup> | 0.6 ± 0.1 <sup>a</sup> | 0.5 ± 0.1 <sup>a</sup>  |
| SM       | 66.2 ± 62.2                                                    | 711 ± 586   | 56.2 ± 54.4            | 45.8 ± 40.5              | 0.8 ± 0.4 <sup>a</sup> | 0.6 ± 0.3 <sup>a</sup> | 0.4 ± 0.1 <sup>a</sup>  |
| GlcCer   | 0.2 ± 0.05 <sup>a</sup>                                        | 5.3 ± 1.3   | 5.2 ± 2.6 <sup>a</sup> | 0.6 ± 0.5                | 0.3 ± 0.2 <sup>a</sup> | 0.9 ± 0.3 <sup>a</sup> | 0.8 ± 0.6 <sup>a</sup>  |
| GalCer   | 1.6 ± 1.3                                                      | 336 ± 239   | 3 ± 2.4                | 2.9 ± 2.7                | 2.5 ± 1 <sup>a</sup>   | 8.9 ± 2.9 <sup>a</sup> | 3.4 ± 1.2 <sup>a</sup>  |
| LacCer   | 0.6 ± 0.2                                                      | 23.3 ± 17.3 | 0.3 ± 0.1              | 1.0 ± 0.5                | 0.2 ± 0.1 <sup>a</sup> | 0.1 ± 0.1 <sup>a</sup> | 0.9 ± 0.04 <sup>a</sup> |

<sup>a</sup> p<0.05 (CerS2 null versus WT)
